# Supplementary material
Source: publisher figshare collection journal article supplement (https://acs.figshare.com/ndownloader/files/8965822)
Supplement: Supplementary file 1 [file 8965822]

Supporting information:

# Adsorption of Water and Ammonia on Graphene: Evidence for Chemisorption from X-ray Absorption Spectra

*Stefan Böttcher<sup>†,‡</sup>, Hendrik Vita<sup>†</sup>, Martin Weser<sup>†</sup>, Federico Bisti<sup>§</sup>, Yuriy S. Dedkov<sup>†,||</sup>,  
and Karsten Horn<sup>†,\*</sup>*

<sup>†</sup> Fritz Haber Institut of the Max Planck Society, 14195 Berlin, Germany

<sup>‡</sup> SPECS Surface Nano Analysis GmbH, 13355 Berlin, Germany

<sup>§</sup> Dipartimento di Science Fisiche e Chimiche, Università dell'Aquila, 67100

L'Aquila, Italy

<sup>||</sup> Fachbereich Physik, Universität Konstanz, Germany

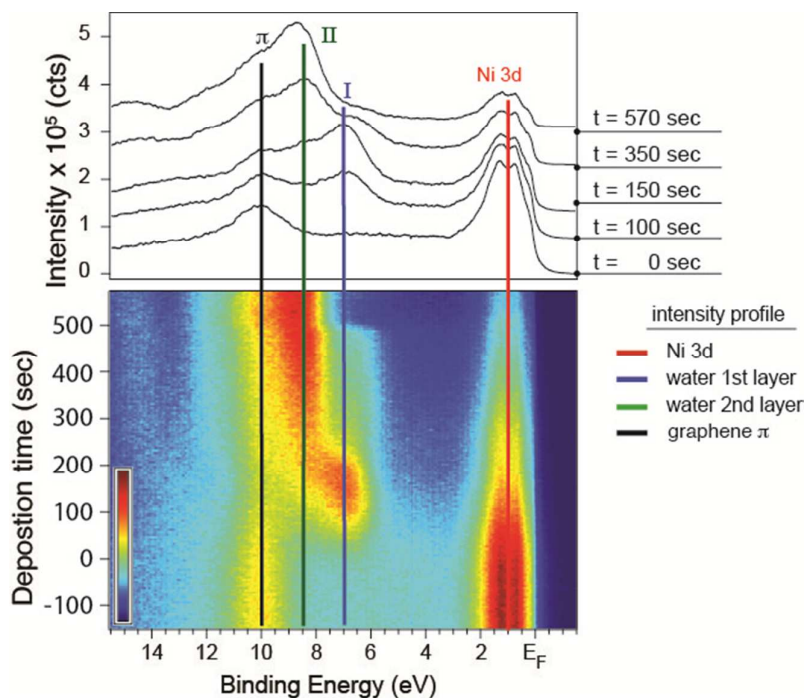

Figure S1: (top) Valence level spectra of water on graphene/Ni(111) for different exposures as indicated on the right. (bottom) Sequence of valence level spectra taken as adsorption proceeds, in a false color representation. The vertical bars indicate the location of the valence level line from water for first and second adsorbed layers, demonstrating the shift that occurs when the second layer buildup commences. Data in Figures 1 and 2 were taken from layers where the second layer signal was absent.

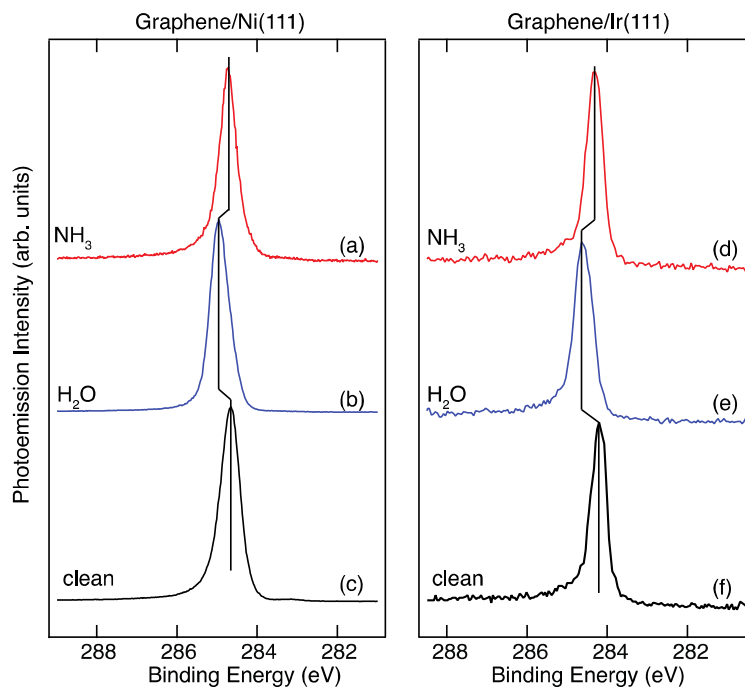

Figure S2: C1s core level spectra obtained for graphene/Ni(111) (left panel) as well as for graphene/Ir(111) (right panel) with water and ammonia adsorbed. The C1s core level state shifts upon adsorption of water to higher binding energies ( $\Delta E_B = 300$  meV). In case of adsorbed ammonia this shift is almost negligible ( $\Delta E_B < 100$  meV).

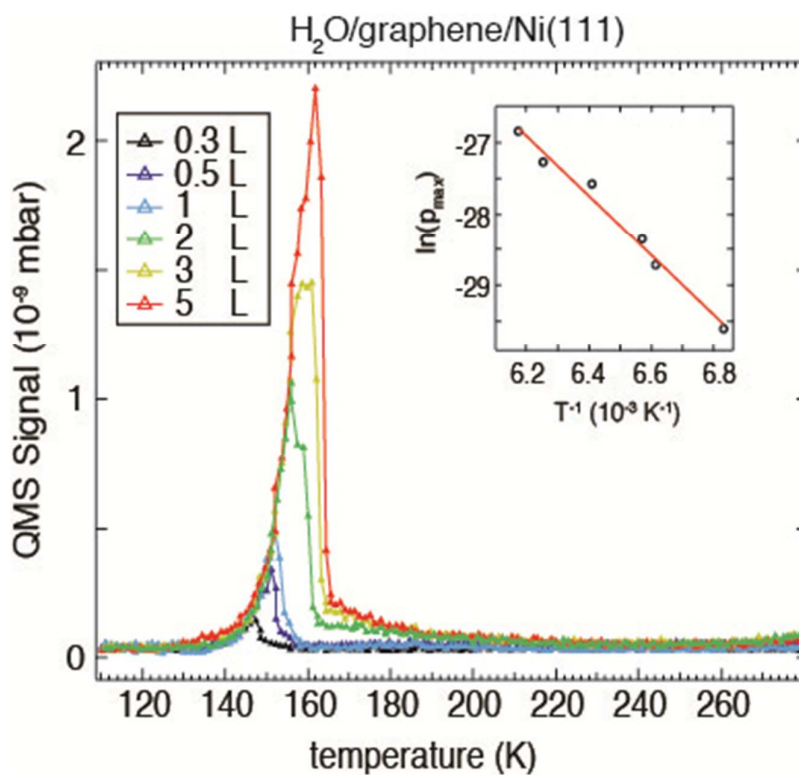

Figure S3: Thermal desorption data from water on graphene/Ni(111) used to determine the binding energy of water ( $E_{\text{des}} = 356 \text{ meV/molecule}$ ).
